# Supplementary material for: TRPS1 shapes YAP/TEAD-dependent transcription in breast cancer cells
Source: PubMed Central journal article supplement (PMC6079100; doi:10.1038/s41467-018-05370-7), 2018-08-06
Supplement: 41467_2018_5370_MOESM1_ESM.pdf [file 41467_2018_5370_MOESM1_ESM.pdf]

## Supplementary Information

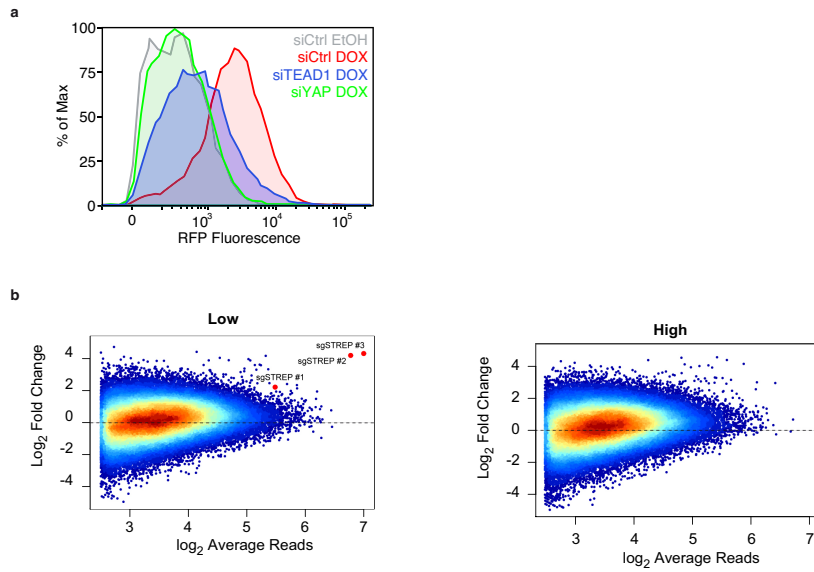

### Supplementary Figure 1

(a) Flow cytometry for RFP in doxycycline-induced sensor cells transfected with a control siRNA (siCtrl) or siRNAs targeting TEAD1 or YAP, respectively. (b) sgRNAs enrichment, as determined by Next-Generation Sequencing, in Low vs unsorted cells (left) and in High vs unsorted cells (right) after infection of the sensor cells with the GeCKO v2 lentiviral CRISPR library.

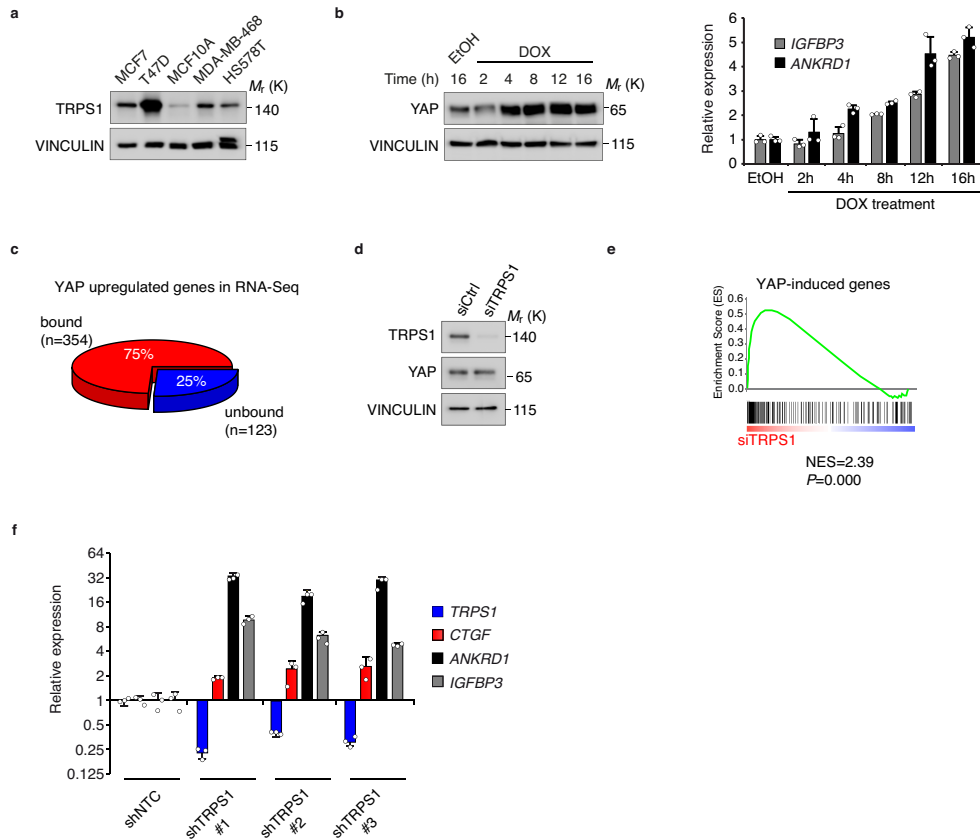

## Supplementary Figure 2

(a) Western blot for TRPS1 in different breast cancer cell lines. Equal amounts of lysates were loaded per cell line. Vinculin serves as loading control.

(b) Western blot for YAP (left) and qRT-PCR analysis of *IGFBP3* and *ANKRD1* expression (right) at different time points after doxycycline induction (DOX) of Strep-YAP 5SA expression in MCF7 i5SA cells. Ethanol (EtOH) was used as uninducing control. Error bars represent s.d..

(c) Pie chart depicting the proportion of YAP bound (direct targets) and unbound (indirect targets) promoter regions among the genes that were upregulated in RNA-Seq.

(d) Western blot for TRPS1 and YAP after depletion of TRPS1 in T47D cells by siRNAs. siCtrl: siRNA control. Vinculin serves as loading control.

(e) Gene set enrichment analysis (GSEA) for RNA-Sequencing from TRPS1-depleted MCF7 cells for a set of 497 YAP-induced genes. NES: Normalized Enriched Score.

(f) qRT-PCR analysis of the expression of *TRPS1*, *CTGF*, *ANKRD1* and *IGFBP3* after shRNA-mediated depletion of TRPS1 in MCF7 cells. shNTC: shRNA non-targeting control. Error bars represent s.d..

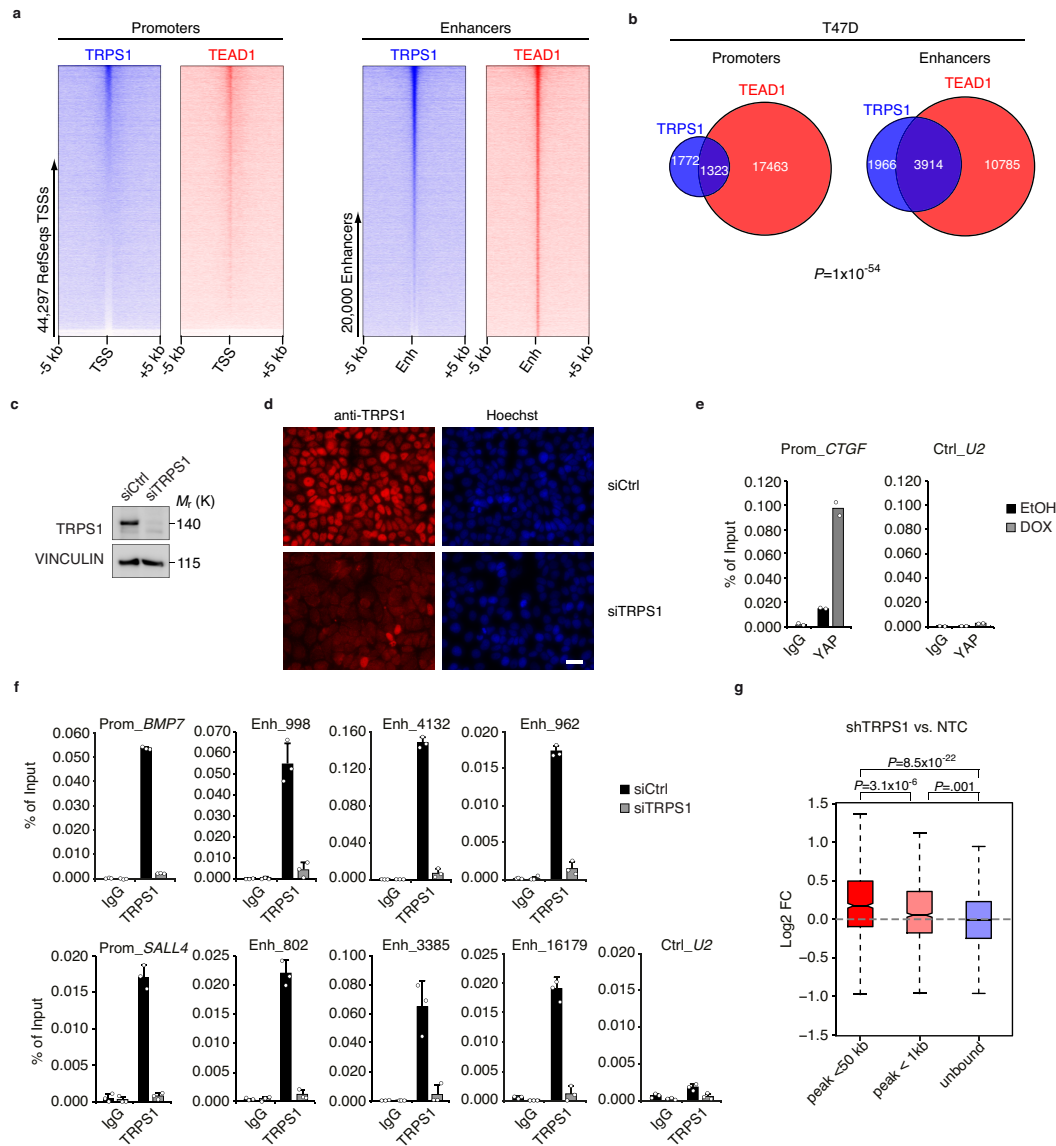

### Supplementary Figure 3

(a) Heatmaps of ChIP-Seq data from T47D cells showing the occupancy of TRPS1 and TEAD1 at all RefSeq transcriptional start sites (TSSs) and all enhancer regions. The heatmaps were sorted according to TRPS1 binding.

(b) Venn diagram showing the overlap of enhancer sites bound by TRPS1 and TEAD1 in T47D cells.

(c) Western blot for TRPS1 in MCF7 cells transfected with siCtrl or siRNAs targeting TRPS1.

(d) Immunofluorescence stainings for TRPS1 in MCF7 cells with the TRPS1-specific antibody generated for ChIP experiments. Cells were transfected with either siTRPS1 or siCtrl. Hoechst counterstaining was used to stain nuclei. Scale bar = 50  $\mu$ m.

(e) qChIP analysis for YAP binding at the *CTGF* promoter in MCF7 i5SA cells after induction by doxycycline (DOX) or ethanol control (EtOH). *U2* serves as control region. Control IPs were performed using rabbit IgG.

(f) qChIP analysis for TRPS1 binding at two promoters (Prom) and 6 different enhancer sites (Enh) in MCF7 cells transfected with siCtrl or siRNA targeting

TRPS1. *U2* serves as control region. Control IPs were performed using rabbit IgG. Error bars represent s.d..

(g) Boxplot for the expression changes after TRPS1 depletion (shTRPS1 vs. shNTC). The genes were stratified according to the presence of a TRPS1 ChIP-Seq peak in a 50 kb window (left boxplot), a peak in a 1 kb window (middle boxplot) and having no TRPS1 peak (right boxplot) in a 50 kb window. For both “bound” groups (50 kb and 1 kb) the 1000 peaks with the highest confidence (based on FDR) were selected for this analysis. NTC = non-targeting control; Log2 FC = Log2 fold change. Median: black line; boxes: data points between the first and third quartiles; whiskers: up to 1.5x interquartile range; points: outliers. Wilcox-test, two-sided.

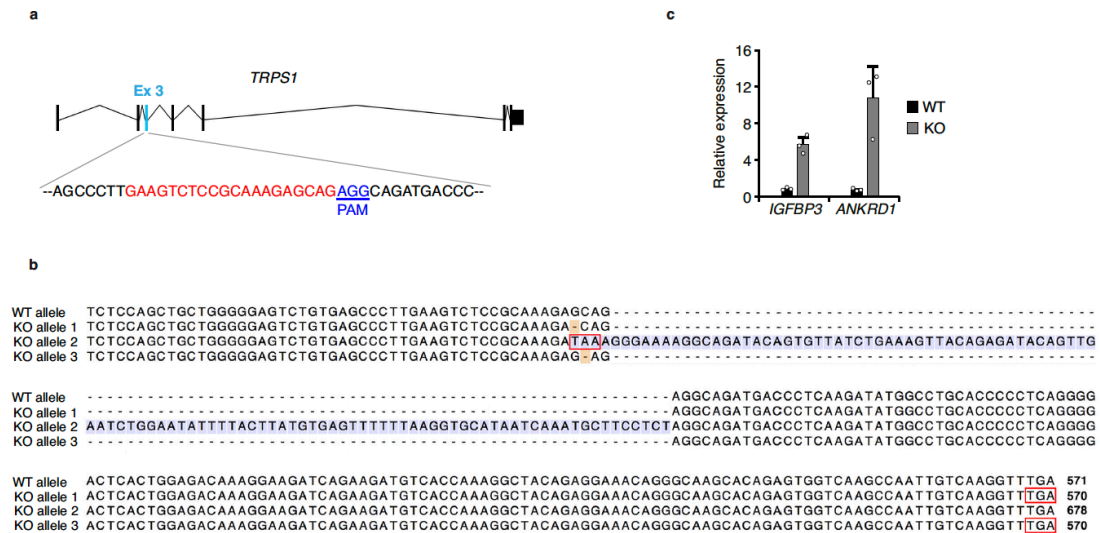

### Supplementary Figure 4

(a) Schematic of the *TRPS1* locus. The position of the sequence targeted by the sgRNA in exon 3 (Ex3) is indicated in red. This sgRNA was used for generation of *TRPS1* CRISPR KO cells.

(b) Alignment of the three different KO alleles identified by Sanger sequencing after CRISPR-mediated genome editing of the *TRPS1* locus. The WT allele is given at the top. Insertion and deletions are highlighted in blue and orange, respectively. Newly created premature stop codons are shown with red boxes.

(c) qRT-PCR analysis of *IGFBP3* and *ANKRD1* expression in MCF7 WT vs *TRPS1* KO. The data summarizes three technical replicates. Error bars represent s.d..

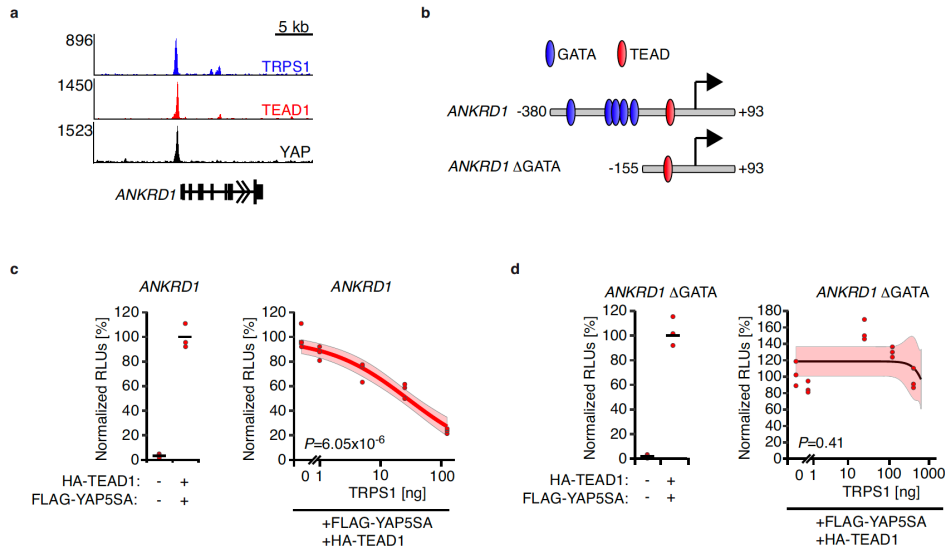

### Supplementary Figure 5

(a) ChIP-Seq tracks for TRPS1, TEAD1 and YAP at the *ANKRD1* transcription start site.

(b) Schematic of the two *ANKRD1* promoter versions used to drive the luciferase reporter: the full-length sequence (*ANKRD1*) and a truncated version lacking the GATA sites (*ANKRD1ΔGATA*).

(c) Luciferase activity of the reporter driven by *ANKRD1* in 293T cells co-transfected with vectors for expression of FLAG-YAP 5SA and HA-TEAD1. The left chart shows the luciferase reporter activity induced by TEAD1/YAP 5SA in the absence of TRPS1. The right chart shows the repressing effect of increasing amounts of TRPS1 on the reporter activity as a dose response curve. Data presented are from 3 biological replicates. The *P*-value describes if increasing TRPS1 concentrations affect the luciferase signal, one-way ANOVA.

(d) Luciferase activity of the reporter driven by *ANKRD1* DGATA in 293T cells co-transfected with vectors for expression of FLAG-YAP 5SA and HA-TEAD1. The left chart shows the luciferase reporter activity induced by TEAD1 in the absence of TRPS1. The right chart shows the repressing effect of increasing amounts of TRPS1 on the reporter activity. Data presented are from three biological replicates. The *P*-value describes if increasing TRPS1 concentrations affect the luciferase signal, one-way ANOVA. Normalized RLUs: Relative luciferase light units.

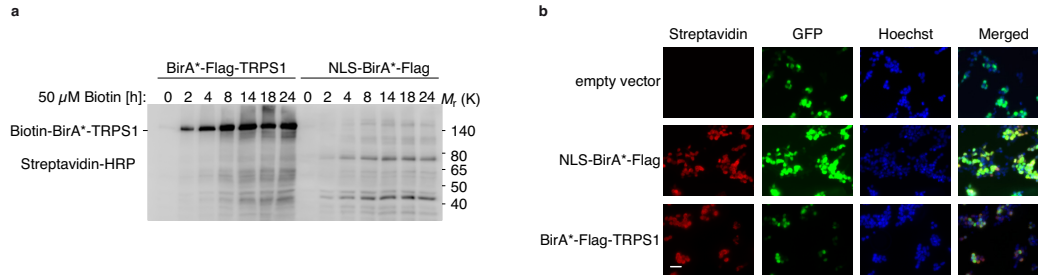

### Supplementary Figure 6

(a) Western blot for proteins biotinylated by BirA\*-Flag-TRPS1 and NLS-BirA\*-Flag at different time points after addition of biotin. Biotinylated proteins were detected by streptavidin coupled to horseradish peroxidase (Streptavidin-HRP).

(b) Immunofluorescence stainings of 293T cells transfected with NLS-BirA\*-Flag or BirA\*-Flag-TRPS1 constructs or an empty vector control. Biotinylated proteins were identified by Streptavidin PE-Cy7. Transfected cells were identified by GFP that is co-expressed by means of an IRES element. Hoechst is used to stain nuclei. Scale bar = 50  $\mu$ m.

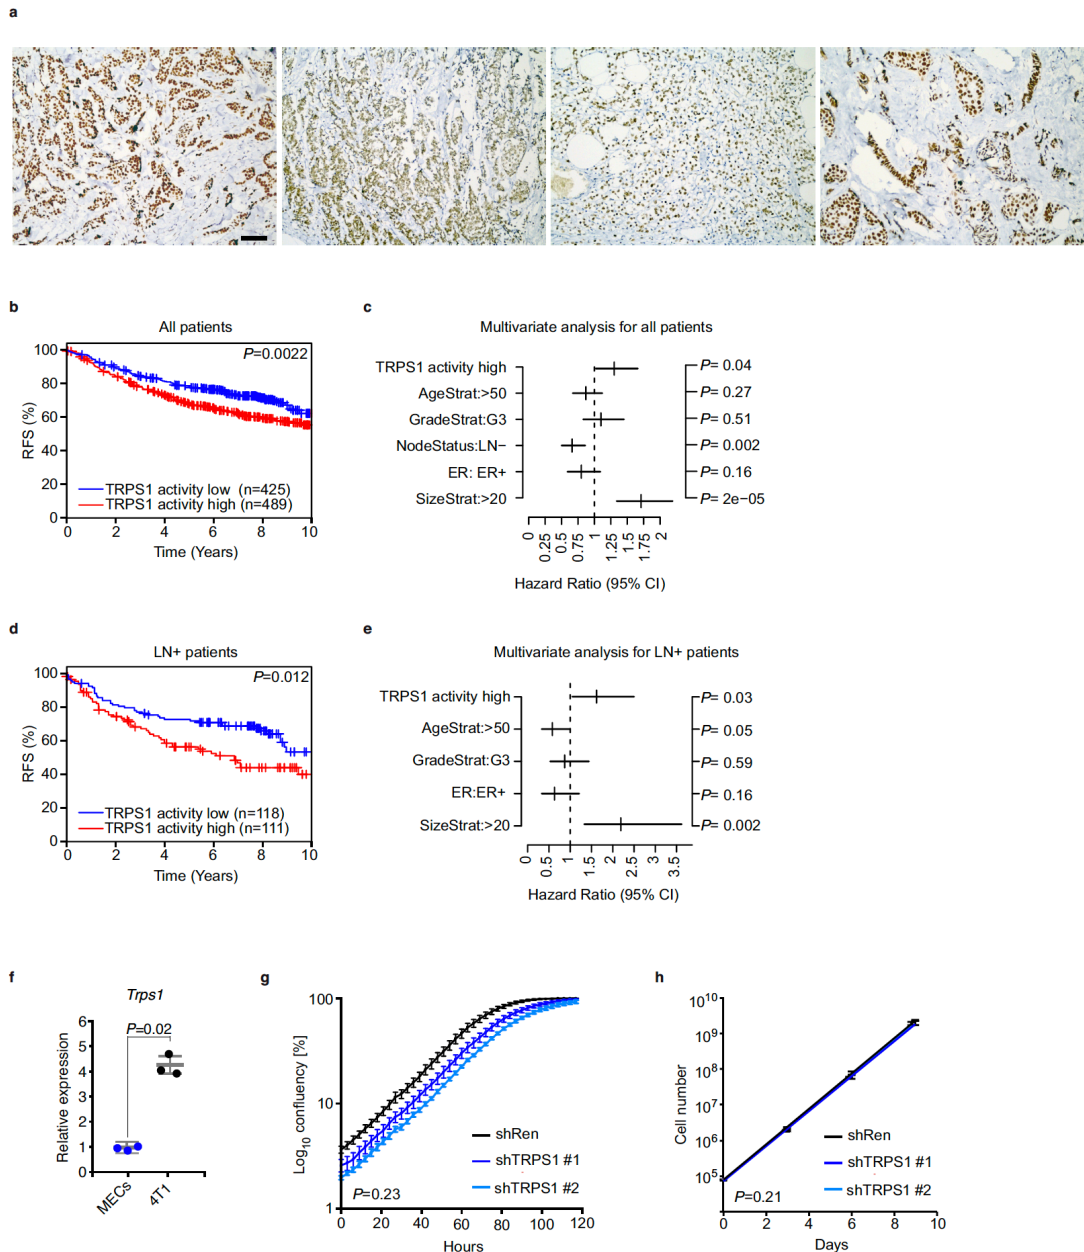

### Supplementary Figure 7

(a) Immunohistochemical staining for TRPS1 on tissue sections from four representative human breast cancer patients. Scale bar = 100  $\mu$ m.

(b) Kaplan-Meier plot for the survival probability of breast cancer patients that were stratified according to their TRPS1 activity. TRPS1 activity was defined by the expression of a TRPS1-repressed target gene set. High TRPS1 activity is consequently associated with low expression of this gene set. The  $P$ -values were determined by a Chi-square test. RFS: recurrence-free survival.

(c) Multivariate analysis including the given parameters for patients included in (b). The hazard ratio and the corresponding 95% confidence interval (CI) are given as a vertical or horizontal line, respectively.

(d) The same analysis as in (b) was performed, except that only lymph node-positive (LN+) patients were included in the analysis. RFS: recurrence-free survival.



(e) Multivariate analysis including the given parameters for patients included in (d). The hazard ratio and the corresponding 95% confidence interval (CI) are given as a vertical or horizontal line, respectively.

(f) qRT-PCR analysis for *Trps1* expression in FACS-purified mouse mammary epithelial cells (MECs) and 4T1 cells, respectively. Each dot represents a biological replicate. The *P*-Value was determined by a Welch's t-test.

(g) Incubate growth rate of 4T1 cells infected with a control shRenilla or two different shRNAs targeting *Trps1*. A one-way ANOVA test was performed to test for differences in doubling time.

(h) Cumulative growth curve of 4T1 cells infected with a control shRenilla or two different shRNAs targeting *Trps1*. A one-way ANOVA test was performed to test for differences in doubling time.

Supplementary Table 1 – Antibodies

| Application                   | Antibody               | Company               | Reference           | Dilutions    |              |
|-------------------------------|------------------------|-----------------------|---------------------|--------------|--------------|
| Western Blot                  | anti-YAP               | Cell signaling        | 14074               | 1:1000       |              |
|                               | anti-CTGF              | Santa Cruz            | sc-14939            | 1:500        |              |
|                               | anti-Vinculin          | Sigma-Aldrich         | V9131               | 1:100000     |              |
|                               | anti-TRPS1             | Abcam                 | ab209664            | 1:2000       |              |
|                               | anti-FLAG              | Sigma-Aldrich         | F1804               | 1:2000       |              |
|                               | anti-HA                | Covance/<br>Biolegend | 901502 /<br>B220767 | 1:2000       |              |
|                               | anti-GAL4              | Santa Cruz            | sc-510              | 1:2000       |              |
|                               | anti-TRPS1             | Bethyl                | A303-563A           | 1:2000       |              |
|                               | anti-V5                | Cell signaling        | 13202S              | 1:2000       |              |
|                               | anti-CTBP2             | BD Bioscience         | 612044              | 1:1000       |              |
|                               | anti-SMRT              | Millipore             | 06-891              | 1:1000       |              |
|                               | anti-HDAC1             | Gift from F. Neri     | -                   | 1:1500       |              |
|                               | anti-Pan-TEAD          | Cell signaling        | 13295               | 1:2000       |              |
|                               | anti-rabbit IgG HRP    | Santa Cruz            | sc-2004             | 1:10000      |              |
|                               | anti-mouse IgG HRP     | Santa Cruz            | sc-2005             | 1:10000      |              |
|                               | anti-goat IgG HRP      | Santa Cruz            | sc-2020             | 1:10000      |              |
|                               | anti-rabbit IgG HRP    | Rockland              | 18-8816-33          | 1:4000       |              |
|                               | anti-mouse IgG HRP     | Rockland              | 18-8817-33          | 1:4000       |              |
|                               | ChIP/ChIP-Seq          | anti-TRPS1            | selfmade            | -            | 2 µg/10 µg   |
|                               |                        | anti-TEAD1            | BD Bioscience       | 610923       | 2 µg/10 µg   |
| anti-YAP                      |                        | Abcam                 | ab52771             | -/10 µg      |              |
| anti-H3K27ac                  |                        | Abcam                 | ab4729              | -/5 µg       |              |
| anti-CTBP2                    |                        | BD Bioscience         | 612044              | 2 µg/5 µg    |              |
| anti-HDAC3                    |                        | Cell signaling        | 85057               | 5 µl /15 µl  |              |
| anti-SMRT                     |                        |                       |                     | 2 µg/-       |              |
| anti-IgG rabbit               |                        | Sigma                 | I5006               | 2 µg/5-10 µg |              |
| anti-IgG mouse                |                        | Sigma                 | I5381               | 2 µg/5-10 µg |              |
| Co-IP<br>exogenous/endogenous |                        | anti-TRPS1            | selfmade            | -            | 0.75 µg/4 µg |
|                               | anti-IgG rabbit        | Sigma                 | I5006               | 0.75 µg/4 µg |              |
| IF                            | anti-TRPS1             | selfmade              | -                   | 1:400        |              |
|                               | Streptavidin-PE-Cy7    | eBioscience           | 25-4317-82          | 1:400        |              |
|                               | anti-rabbit Alexa 546  | Life Technologies     | A10040              | 1:1000       |              |
|                               | Hoechst 33342          | Sigma                 | B2261               | 1:5000       |              |
| IHC                           | anti-CD3 (Gamma Chain) | Abcam                 | ab134096            | 1:375        |              |
|                               | anti-TRPS1             | Abcam                 | ab209664            | 1:8000       |              |
| FACS                          | Anti-CD31 biotin       | eBiosciences          | 13-0311-81          | 1:50         |              |
|                               | Anti-CD45 biotin       | eBiosciences          | 13-0451-85          | 1:50         |              |
|                               | Streptavidin-APC       | eBiosciences          | 17-4317-82          | 1:200        |              |
|                               | Anti-EpCAM-PE          | eBiosciences          | 12-5791-81          | 1:100        |              |
|                               | Anti-CD49f-FITC        | eBiosciences          | 11-0495-80          | 1:100        |              |

Supplementary Table 2 - Primers

| Application      | Primer                   | Fw                                                                                   | Rev                                                                                      |                                                 |
|------------------|--------------------------|--------------------------------------------------------------------------------------|------------------------------------------------------------------------------------------|-------------------------------------------------|
| qRT-PCR          | ANKRD1                   | AGTAGAGGAACTGGTCACTGG                                                                | TGTTTCTCGCTTTTCCACTGTT                                                                   |                                                 |
|                  | b2M                      | GTGCTCGCGCTACTCTCTC                                                                  | GTCAACTTCAATGTCCGGAT                                                                     |                                                 |
|                  | CTGF                     | AATGCTGCGAGGAGTGGGTG                                                                 | TTGGGTCTGGGCCAAACGTG                                                                     |                                                 |
|                  | IGFBP3                   | AGAGCACAGATACCCAGAACT                                                                | GGTGATTCAGTGTGTCTTCCATT                                                                  |                                                 |
|                  | NT5E                     | CCAGTACCAGGGCACTATCTG                                                                | TGGCTCGATCAGTCCTTCCA                                                                     |                                                 |
|                  | RASSF2                   | AAGAAGACGAGTTCATTGTGGAG                                                              | GAATGCGTTCGTTGTCATCC                                                                     |                                                 |
|                  | TGFB2                    | CAGCACACTCGATATGGACCA                                                                | CCTCGGGCTCAGGATAGTCT                                                                     |                                                 |
|                  | TRPS1                    | ATGACACTCCTGTTGGGTACT                                                                | CGTGCTGCTTGCCATAATGTT                                                                    |                                                 |
|                  | VGLL1                    | TCAGAGTGAAGGTGTGATGCT                                                                | GCACGGTTTGTGACAGGTACT                                                                    |                                                 |
|                  |                          |                                                                                      |                                                                                          |                                                 |
|                  | qChIP                    | Prom_BMP7                                                                            | GGCGTGAGTTTGTGTCTTG                                                                      | TCCGAGATAACACACCCCGA                            |
| Prom_CTGF        |                          | ATATGAATCAGGAGTGGTGCGA                                                               | CAACTCACACCGGATTGATCC                                                                    |                                                 |
| Prom_SALL4       |                          | GGATTCCCTGTTACAAAGACTGG                                                              | TGCTTGCTTATCATTGCCATT                                                                    |                                                 |
| Enh_802          |                          | ACACTGTTCTTTATCGAGCCCT                                                               | TGGACTGTTGGACGGAATGAG                                                                    |                                                 |
| Enh_962          |                          | ACTCCCTGGCACTGAGGTTA                                                                 | GTGAGAAGGGAGGTGGGAGA                                                                     |                                                 |
| Enh_998          |                          | CACCACTGCCACCTACTTCC                                                                 | ACAACACCTTGCCAGACACT                                                                     |                                                 |
| Enh_3385         |                          | TCCAGGGCACAGAGAAGAGA                                                                 | TCCCCTCGAGACTTGTGGAT                                                                     |                                                 |
| Enh_4132         |                          | CTGCTTTCCAAGGGCTCTCC                                                                 | TGAGTGCATTGTGACCATGC                                                                     |                                                 |
| Enh_16179        |                          | TCTTTGGAATGCTGCCTGACT                                                                | GGCCCCTATAGCACAATGGT                                                                     |                                                 |
| Enh_55           |                          | AGCTCTGCCATCTTGTAACTGT                                                               | AGGAAGCATTGGTCAACAGGT                                                                    |                                                 |
| Enh_905          |                          | CACTATTGACATTTGGTGCCAGA                                                              | ACATAAGGAGGCAGCTTGAGG                                                                    |                                                 |
| U2_Ctrl          |                          | TTTGCTCCCACTGCCGTC                                                                   | CTGAGTCTTTTCGGTGCCC                                                                      |                                                 |
|                  |                          |                                                                                      |                                                                                          |                                                 |
| 4C-Seq           |                          | IGFBP3 TSS                                                                           | AATGATACGGCGACCACCGAAC<br>ACTCTTTCCCTACACGACGCTCT<br>TCCGATCTGAGAAATAAAGTTCC<br>TGCCTTGC | CAAGCAGAAGACGGCATAACGACT<br>TCCTTGGTCCAAATCCG*C |
|                  |                          | Ctr #1                                                                               | AATGATACGGCGACCACCGAAC<br>ACTCTTTCCCTACACGACGCTCT<br>TCCGATCTGCCTCAATAAATGCA<br>GCT*A    | CAAGCAGAAGACGGCATAACGAA<br>TGCATAGACAGTCCCTG*A  |
|                  | Ctr #3                   | AATGATACGGCGACCACCGAAC<br>ACTCTTTCCCTACACGACGCTCT<br>TCCGATCTGGCTCCATGCCTCT<br>TTT*T | CAAGCAGAAGACGGCATAACGAGC<br>ACACTCACCACACTCAC*A                                          |                                                 |
|                  |                          |                                                                                      |                                                                                          |                                                 |
| CRISPR<br>Screen | F1_#1 GECKO Fw           | AATGGACTATCATATGCTTACCGTAACTTGAAAGTATTTTCG                                           |                                                                                          |                                                 |
|                  | R1_#3 GECKO<br>Rev       | TCTCTAGGCACCGGATCAATTGCC                                                             |                                                                                          |                                                 |
|                  | F2_#1 GECKO<br>TGACCA Fw | AATGATACGGCGACCACCGAGATGACCACGAGCTCTTGTGGAAGGAC<br>GAAACACCG                         |                                                                                          |                                                 |
|                  | F2_#2 GECKO<br>ACAGTG Fw | AATGATACGGCGACCACCGAGAAGCAGTGCGAGCTCTTGTGGAAGGAC<br>GAAACACCG                        |                                                                                          |                                                 |
|                  | F2_#3 GECKO<br>GCCAAT Fw | AATGATACGGCGACCACCGAGAGCCAATCGAGCTCTTGTGGAAGGAC<br>GAAACACCG                         |                                                                                          |                                                 |
|                  | F2_#4 GECKO<br>CTTGTA Fw | AATGATACGGCGACCACCGAGACTTGTACGAGCTCTTGTGGAAGGAC<br>GAAACACCG                         |                                                                                          |                                                 |
|                  |                          |                                                                                      |                                                                                          |                                                 |

### Supplementary Table 3 - shRNAs

| Gene target | shRNA ID   | No. | 97mer oligo                                                                                           |
|-------------|------------|-----|-------------------------------------------------------------------------------------------------------|
| TRPS1       | TRPS1.1808 | #1  | TGCTGTTGACAGTGAGCGACAGGACAAGATAACAGTCAAATAGTGAAG<br>CCACAGATGTATTTGACTGTTATCTTGTCTGCTGCCTACTGCCTCGGA  |
| TRPS1       | TRPS1.758  | #2  | TGCTGTTGACAGTGAGCGCCAGAGTGATGCTGCAGAACTATAGTGAAG<br>CCACAGATGTATAGTTCTGCAGCATCACTCTGATGCCTACTGCCTCGGA |
| TRPS1       | TRPS1.4226 | #3  | TGCTGTTGACAGTGAGCGAAAAGTTGATAGAAGTACTCAATAGTGAAGC<br>CACAGATGTATTGAGTACTTCTATCAACTTTCTGCCTACTGCCTCGGA |

### Supplementary Table 4 – siRNAs

| Gene target | Dharmacon ID | Specification                                  |
|-------------|--------------|------------------------------------------------|
| NTC         | D-001810-10  | ON-TARGETplus Control Pool, Non-Targeting pool |
| TRPS1       | L-009644-00  | ON-TARGETplus SMART Pool, human TRPS1          |
| YAP1        | L-012200-00  | ON-TARGETplus SMART Pool, human YAP1           |
| TEAD1       | L-012603-00  | ON-TARGETplus SMART Pool, human TEAD1          |

### Supplementary Table 5 - Plasmids

| Plasmid                             | Backbone       | Insert                                          |
|-------------------------------------|----------------|-------------------------------------------------|
| LeGO-iG2-Puro-CTGF-turboRFP sensor  | LeGO-iG2-Puro  | ~200 bp CTGF promoter fragment driving turboRFP |
| pInducer21-YAP5SA                   | pInducer21     | YAP 5SA                                         |
| pGIPZ-shTRPS1#1-3                   | pGIPZ (Thermo) | shTRPS1#1-3                                     |
| pLeGo-EF1a-V5-TRPS1                 | LeGO-iG2-puro  | V5-TRPS1                                        |
| pCMX-Gal4-TEAD1                     | pCMX           | Gal4-TEAD1                                      |
| pCMX-Gal4-TEAD2                     | pCMX           | Gal4-TEAD2                                      |
| pCMX-Gal4-TEAD3                     | pCMX           | Gal4-TEAD3                                      |
| pCMX-Gal4-TEAD4                     | pCMX           | Gal4-TEAD4                                      |
| pCMV-2x-flag-YAP-5SA                | pCDNA3         | YAP5SA                                          |
| pCDNA3-HA-TEAD1                     | pCDNA3         | HA-TEAD1                                        |
| pCDNA3-HA-TEAD4                     | pCDNA3         | HA-TEAD4                                        |
| pGL4.20-ANKRD1                      | pGL4.20        | ANKRD1                                          |
| pGL4.20 ANKRD1 ΔGATA                | pGL4.20        | ANKRD1 ΔGATA                                    |
| pCMV-beta-Gal                       | pCMV           | Beta-gal                                        |
| LeGO-EF1-NLS-BirA*-Flag             | LeGO-iG2-Puro  | NLS-BirA*-Flag                                  |
| LeGO-EF1-BirA*-Flag-V5-TRPS1        | LeGO-iG2-Puro  | BirA*-Flag-V5-TRPS1                             |
| pSpCas9n(BB)-2A-GFP (PX461)-Cas9 WT | pX461          | sgRNA targeting TRPS1                           |
| pRL_CMV (Promega)                   | -              | Renilla                                         |
| pGL4.23_Enh998                      | pGL4.23        | Enhancer#998                                    |
| LeGO-iG2-Puro-2xflag-YAP 5SA ORF    | LeGO-iG2-puro  | 2xflag YAP 5SA                                  |
|                                     |                |                                                 |

The lentiCRISPR v2 library (Addgene # 52961) was a kind gift from Feng Zhang  
 LeGO-iG2 was a gift from Boris Fehse (Addgene plasmid # 27341)  
 pSpCas9n(BB)-2A-GFP (PX461) was a gift from Feng Zhang (Addgene plasmid # 48140)  
 pCMV-flag YAP2 5SA was a gift from Kunliang Guan (Addgene plasmid # 27371)  
 psPAX2 and pMD2.G was a gift from Didier Trono (Addgene plasmid #12259, #12260)  
 pCMX-Gal4-TEAD1/2/3/4 was a gift from Kunliang Guan (Addgene plasmid # 33108 / #33107 / #33106 / #33105)  
 pInducer21 was a kind gift from Stefan Gaubatz
