# Supplementary material for: TRPS1 shapes YAP/TEAD-dependent transcription in breast cancer cells
Source: PubMed Central journal article supplement (PMC6079100; doi:10.1038/s41467-018-05370-7), 2018-08-06
Supplement: 41467_2018_5370_MOESM3_ESM.pdf [file 41467_2018_5370_MOESM3_ESM.pdf]

## **Description of Additional Supplementary Files**

### **File Name: Supplementary Data 1**

**Description:** Full multivariate analysis of breast cancer patients (stratified for TRPS1 target gene expression).
